# Supplementary figures and images for: Comprehensive Analysis of NAC Transcription Factors Reveals Their Evolution in Malvales and Functional Characterization of AsNAC019 and AsNAC098 in Aquilaria sinensis
Source: MDPI journal article supplement (doi:10.3390/ijms242417384), 2023-12-12

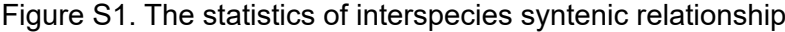

Figure S1. The statistics of interspecies syntenic relationship

Supplement: s1 [file s1]
